# Supplementary material for: Development of High Pressure Sub-scale Regeneratively Cooled Combustion Chambers
Source: MDPI journal article supplement (doi:10.3390/pharmaceutics14030607), 2009-01-01
Supplement: s1 [file s1]

# In Vitro Biological Evaluation of Aprepitant Based $^{177}\text{Lu}$ -Radioconjugates

Paweł K. Halik <sup>1,\*</sup>, Przemysław Koźmiński <sup>1</sup>, Joanna Matalińska <sup>2</sup>, Piotr F. J. Lipiński <sup>2</sup>, Aleksandra Misicka <sup>2,3</sup> and Ewa Gniazdowska <sup>1</sup>

<sup>1</sup> Centre of Radiochemistry and Nuclear Chemistry, Institute of Nuclear Chemistry and Technology,  
03-195 Warsaw, Poland; p.kozminski@ichtj.waw.pl (P.K.);  
e.gniazdowska@ichtj.waw.pl (E.G.)

<sup>2</sup> Department of Neuropeptides, Mossakowski Medical Research Institute, Polish Academy of Sciences,  
02-106 Warsaw, Poland; jmatalinska@imdik.pan.pl (J.M.); plipinski@imdik.pan.pl (P.F.J.L.);  
misicka@chem.uw.edu.pl (A.M.)

<sup>3</sup> Faculty of Chemistry, University of Warsaw, 02-093 Warsaw, Poland

\* Correspondence: p.halik@ichtj.waw.pl; Tel.: +48-22-504-13-16

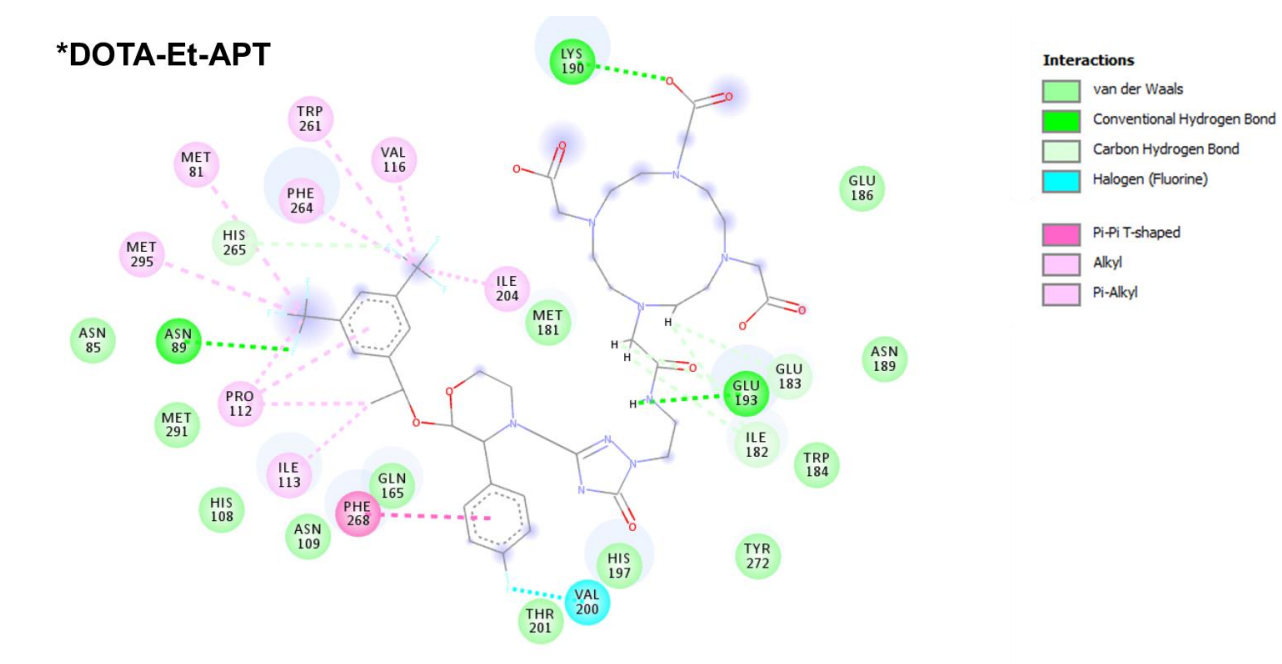

**Figure S1.** Scheme of the interactions of \*DOTA-Et-APT with the NK1R. Interaction types are shown in the legend (top right corner).

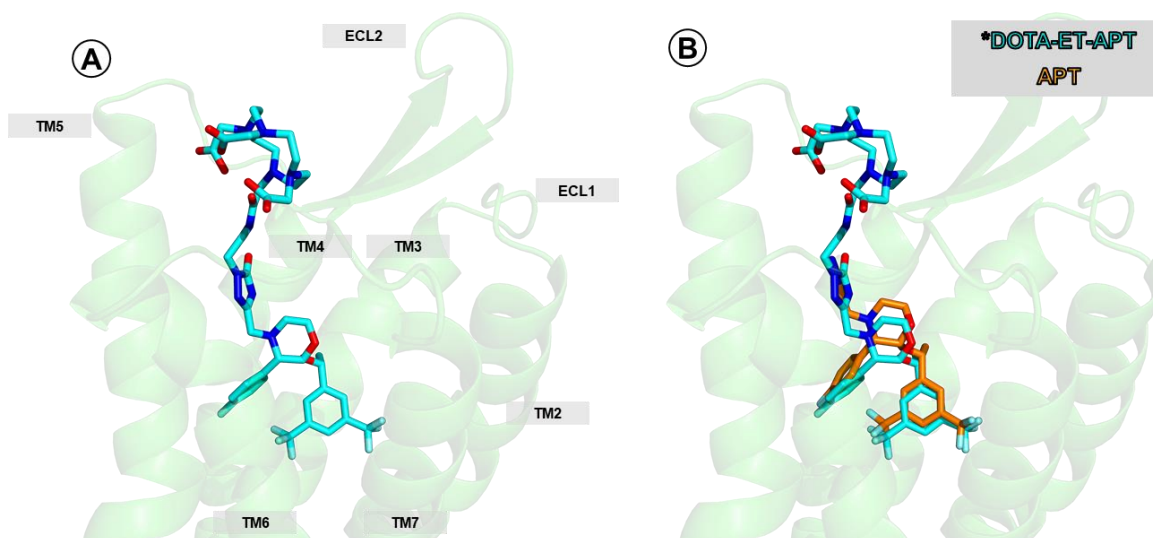

**Figure S2.** Binding mode of \*DOTA-Et-APT in the NK1R (general view). **A)** the ligand alone or **B)** superposed on the crystallographic position of aprepitant (APT). \*DOTA-Et-APT shown as cyan sticks. APT shown as orange sticks. Hydrogen display is suppressed. The receptor is shown in a simplified manner as green helices. TM1 not shown.

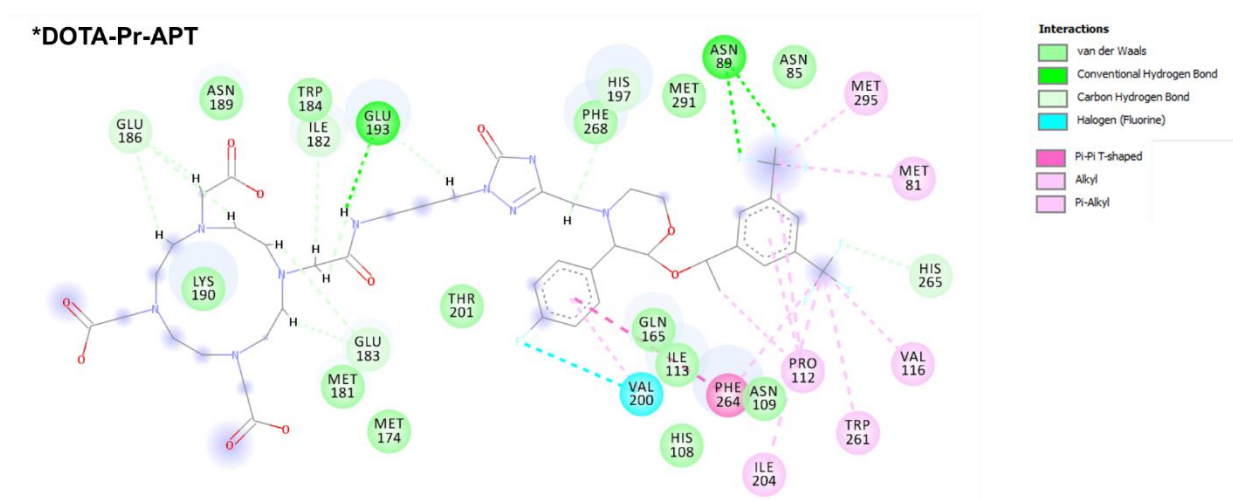

**Figure S3.** Scheme of the interactions of \*DOTA-Pr-APT with the NK1R. Interaction types are shown in the legend (top right corner).

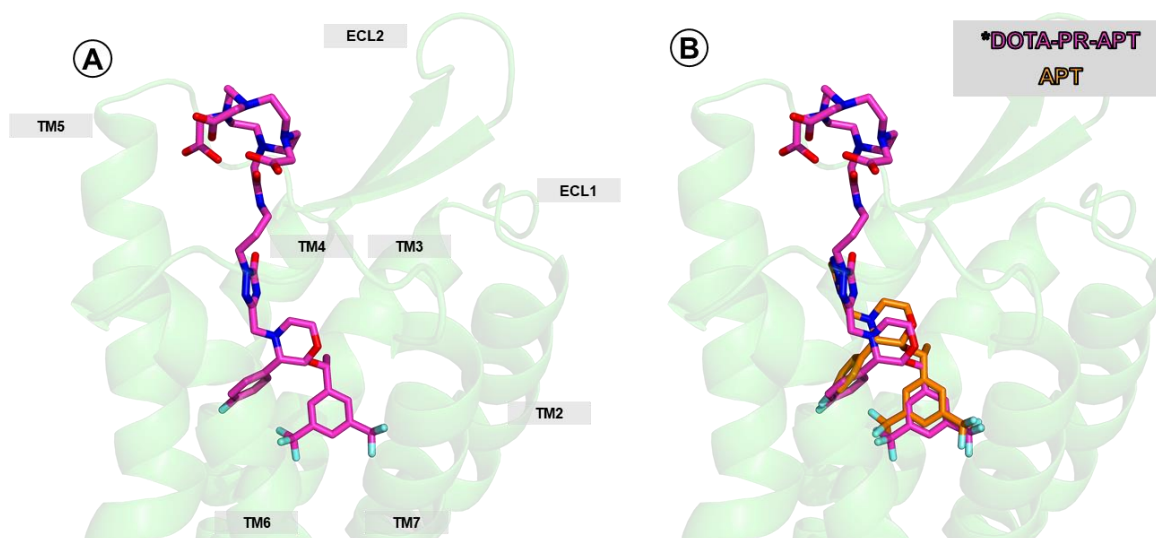

**Figure S4.** Binding mode of \*DOTA-Pr-APT in the NK1R (general view). **A)** the ligand alone or **B)** superposed on the crystallographic position of aprepitant (APT). \*DOTA-Pr-APT shown as magenta sticks. APT shown as orange sticks. Hydrogen display is suppressed. The receptor is shown in a simplified manner as green helices. TM1 not shown.

#### \*DOTA-Bu-APT

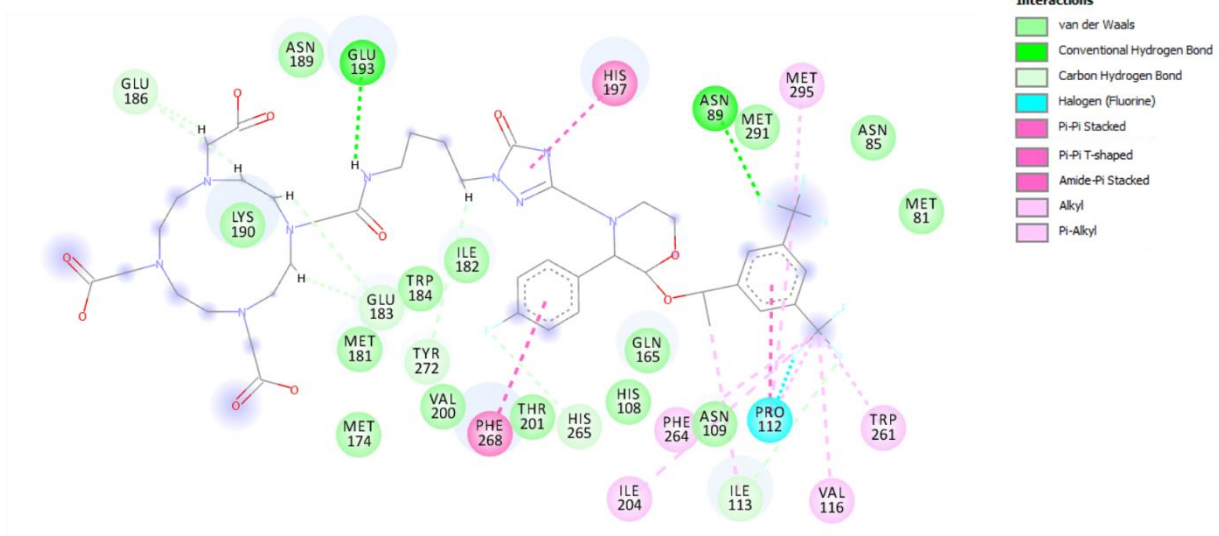

**Figure S5.** Scheme of the interactions of \*DOTA-Bu-APT with the NK1R. Interaction types are shown in the legend (top right corner).

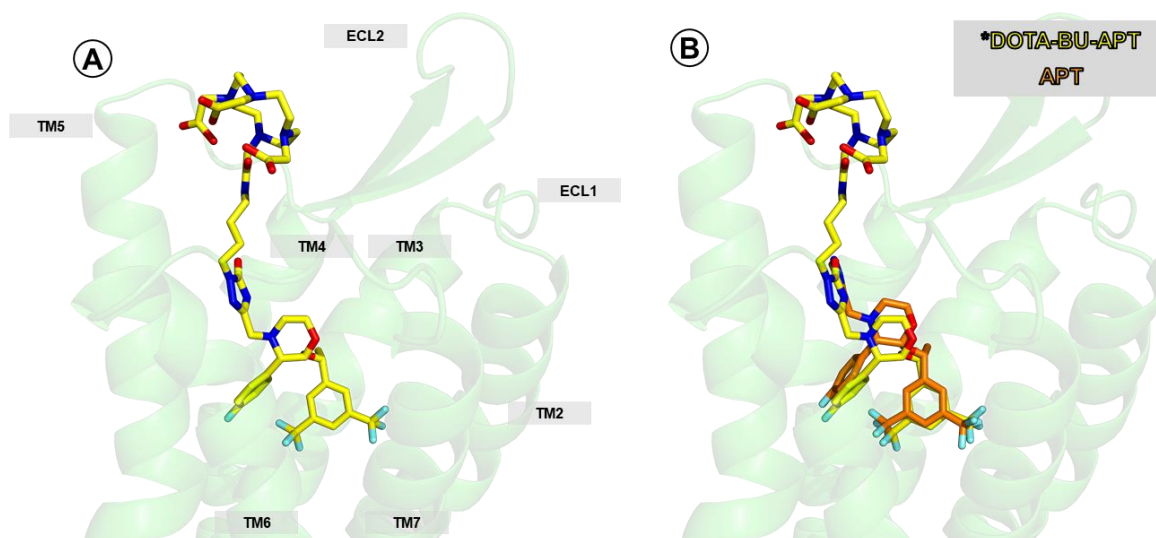

**Figure S6.** Binding mode of \*DOTA-Bu-APT in the NK1R (general view). **A)** the ligand alone or **B)** superposed on the crystallographic position of aprepitant (APT). \*DOTA-Bu-APT shown as yellow sticks. APT shown as orange sticks. Hydrogen display is suppressed. The receptor is shown in a simplified manner as green helices. TM1 not shown.

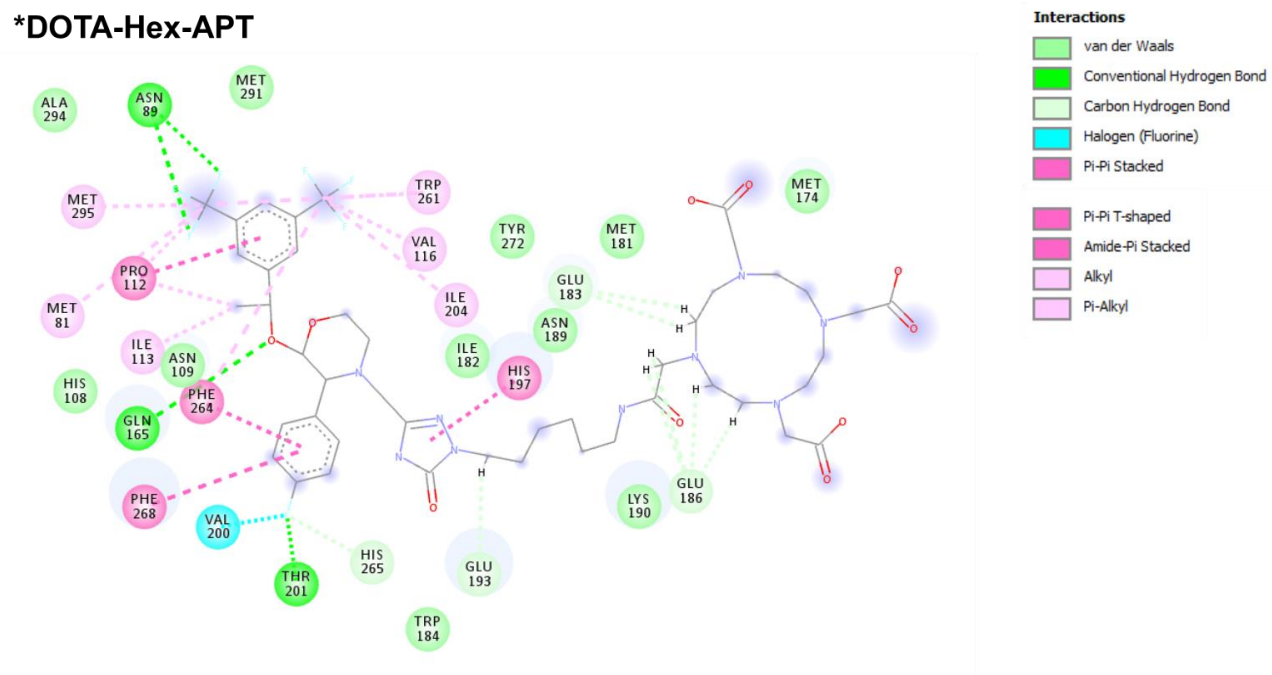

**Figure S7.** Scheme of the interactions of \*DOTA-Hex-APT with the NK1R. Interaction types are shown in the legend (top right corner).

# **\*DOTA-Oct-APT**

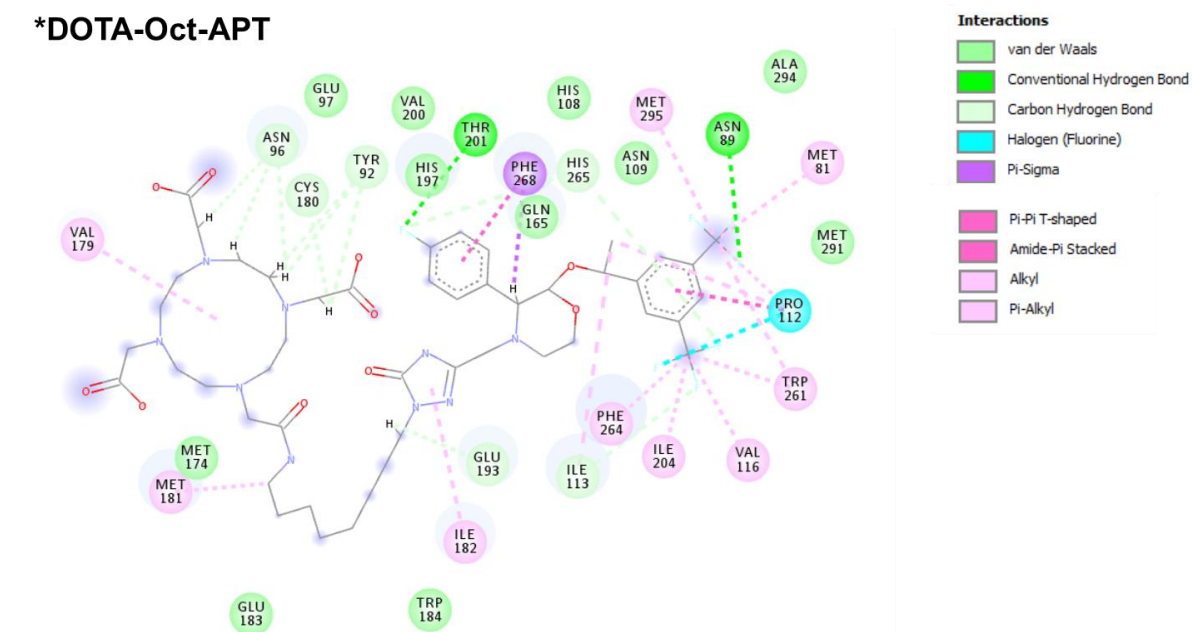

**Figure S8.** Scheme of the interactions of **\*DOTA-Oct-APT** with the NK1R. Interaction types are shown in the legend (top right corner).

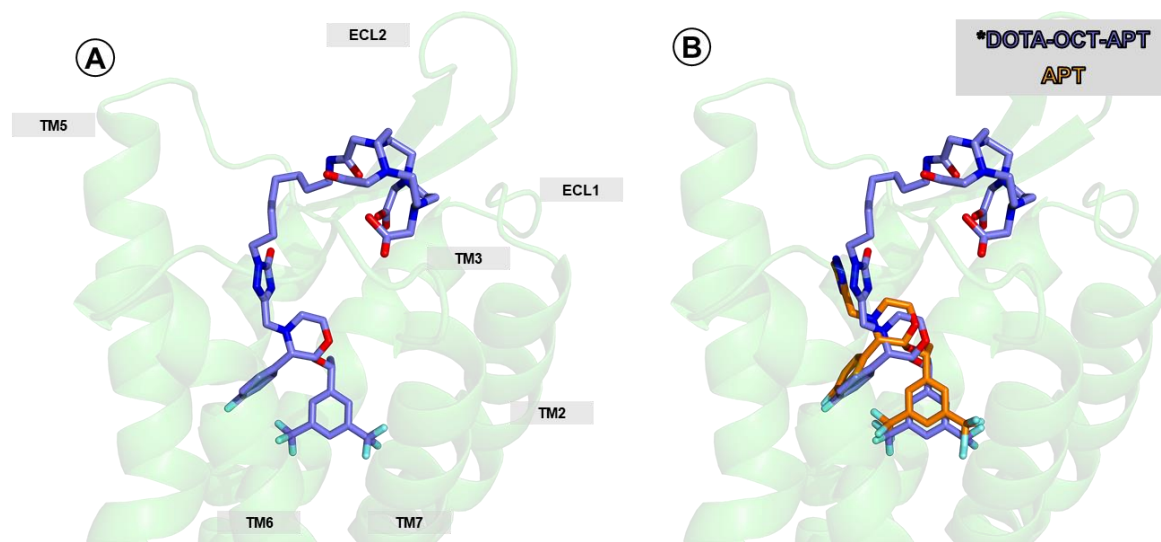

**Figure S9.** Binding mode of **\*DOTA-Oct-APT** in the NK1R (general view). **A)** the ligand alone or **B)** superposed on the crystallographic position of aprepitant (APT). **\*DOTA-Oct-APT** shown as slate blue sticks. APT shown as orange sticks. Hydrogen display is suppressed. The receptor is shown in a simplified manner as green helices. TM1 not shown.



## \*DOTA-Dec-APT

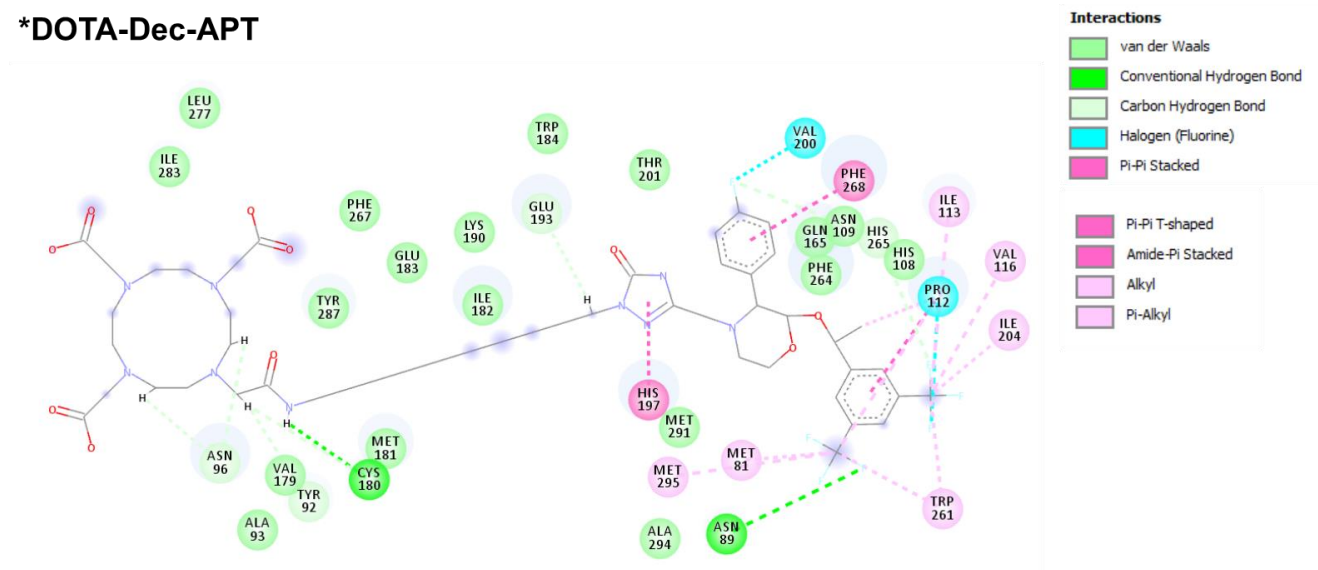

**Figure S10.** Scheme of the interactions of \*DOTA-Dec-APT with the NK1R. Interaction types are shown in the legend (top right corner).

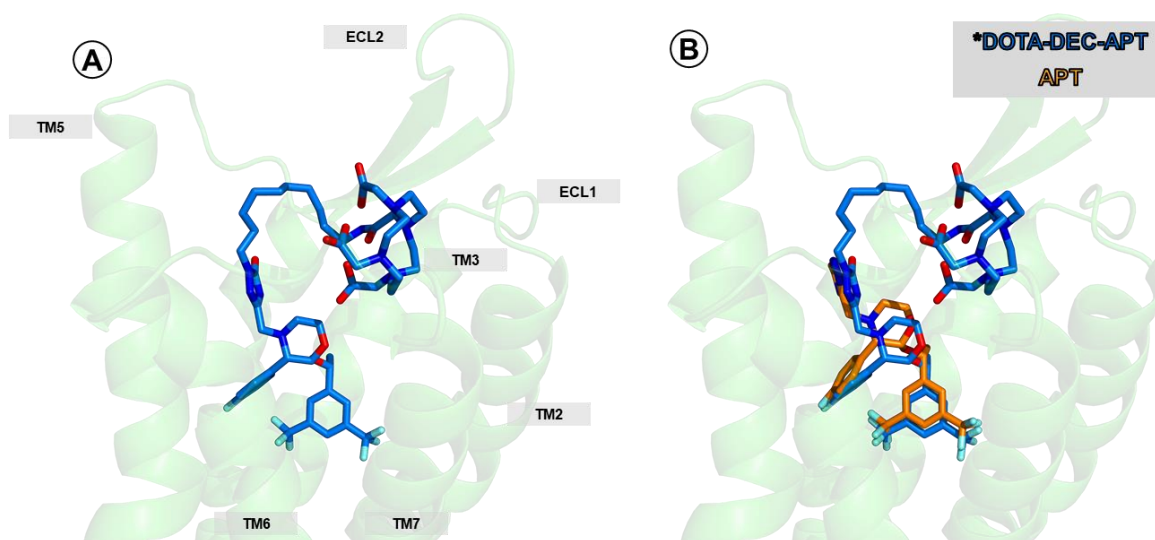

**Figure S11.** Binding mode of \*DOTA-Dec-APT in the NK1R (general view). **A)** the ligand alone or **B)** superposed on the crystallographic position of aprepitant (APT). \*DOTA-Dec-APT shown as marine-blue sticks. APT shown as orange sticks. Hydrogen display is suppressed. The receptor is shown in a simplified manner as green helices. TM1 not shown.
